# Supplementary material
Source: PubMed Central journal article supplement (PMC6081251)
Supplement: NIHMS973177-supplement-S1.pdf [file NIHMS973177-supplement-S1.pdf]

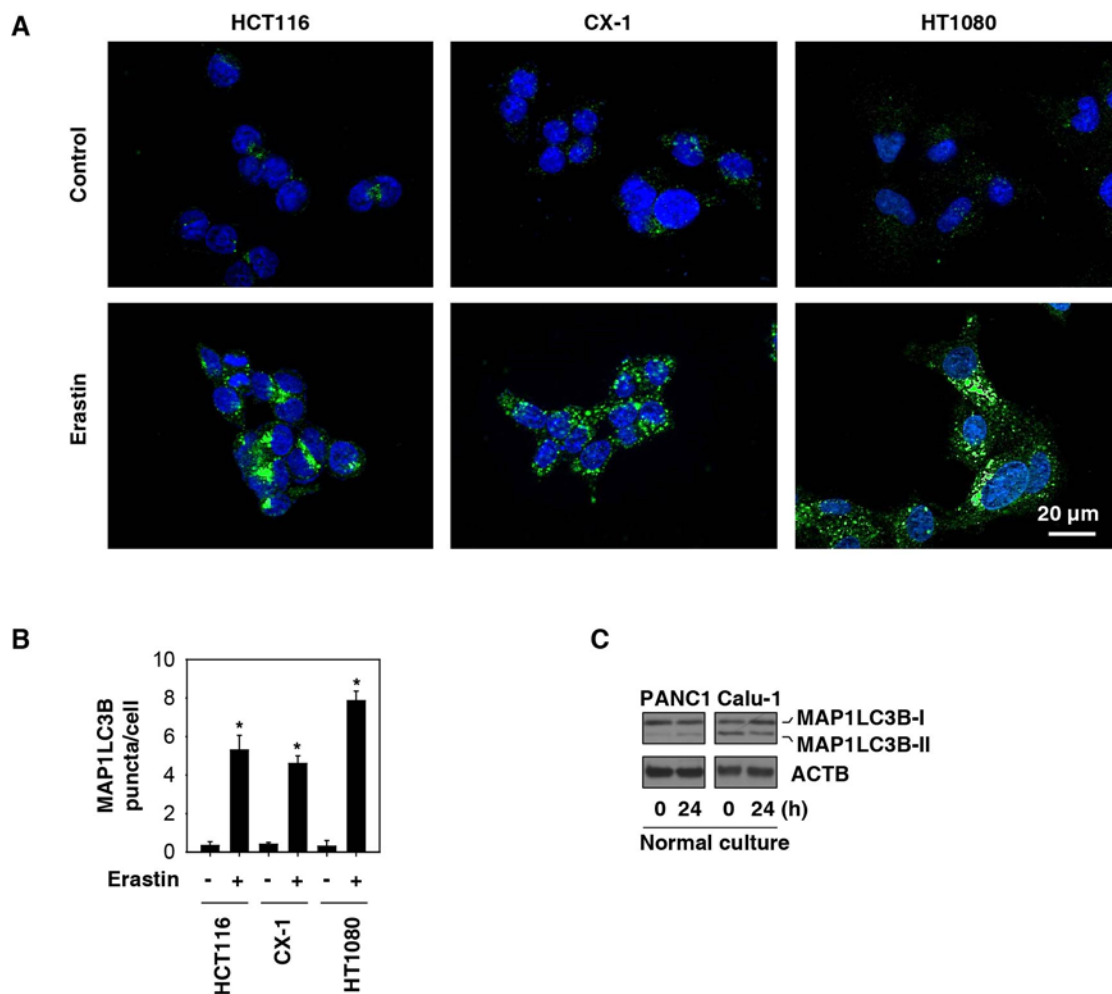

**Figure S1. Erastin induces MAP1LC3B puncta formation, Related to Figure 1.** Analysis of MAP1LC3B puncta formation in HCT116 (20  $\mu$ M, 6 h), CX-1 (20  $\mu$ M, 6 h), and HT1080 (10  $\mu$ M, 6 h) cells by image analysis. Images were acquired digitally from a randomly selected pool of 10 fields under each condition. **(A)** Representative images (green, MAP1LC3B; blue, nucleus). **(B)** Quantitative analysis of MAP1LC3B puncta per cell (\*,  $P < 0.05$  versus control group,  $t$  test). **(C)** Western blot analysis of MAP1LC3B protein expression in PANC1 and Calu-1 cells under normal cell culture condition for 24 hours.

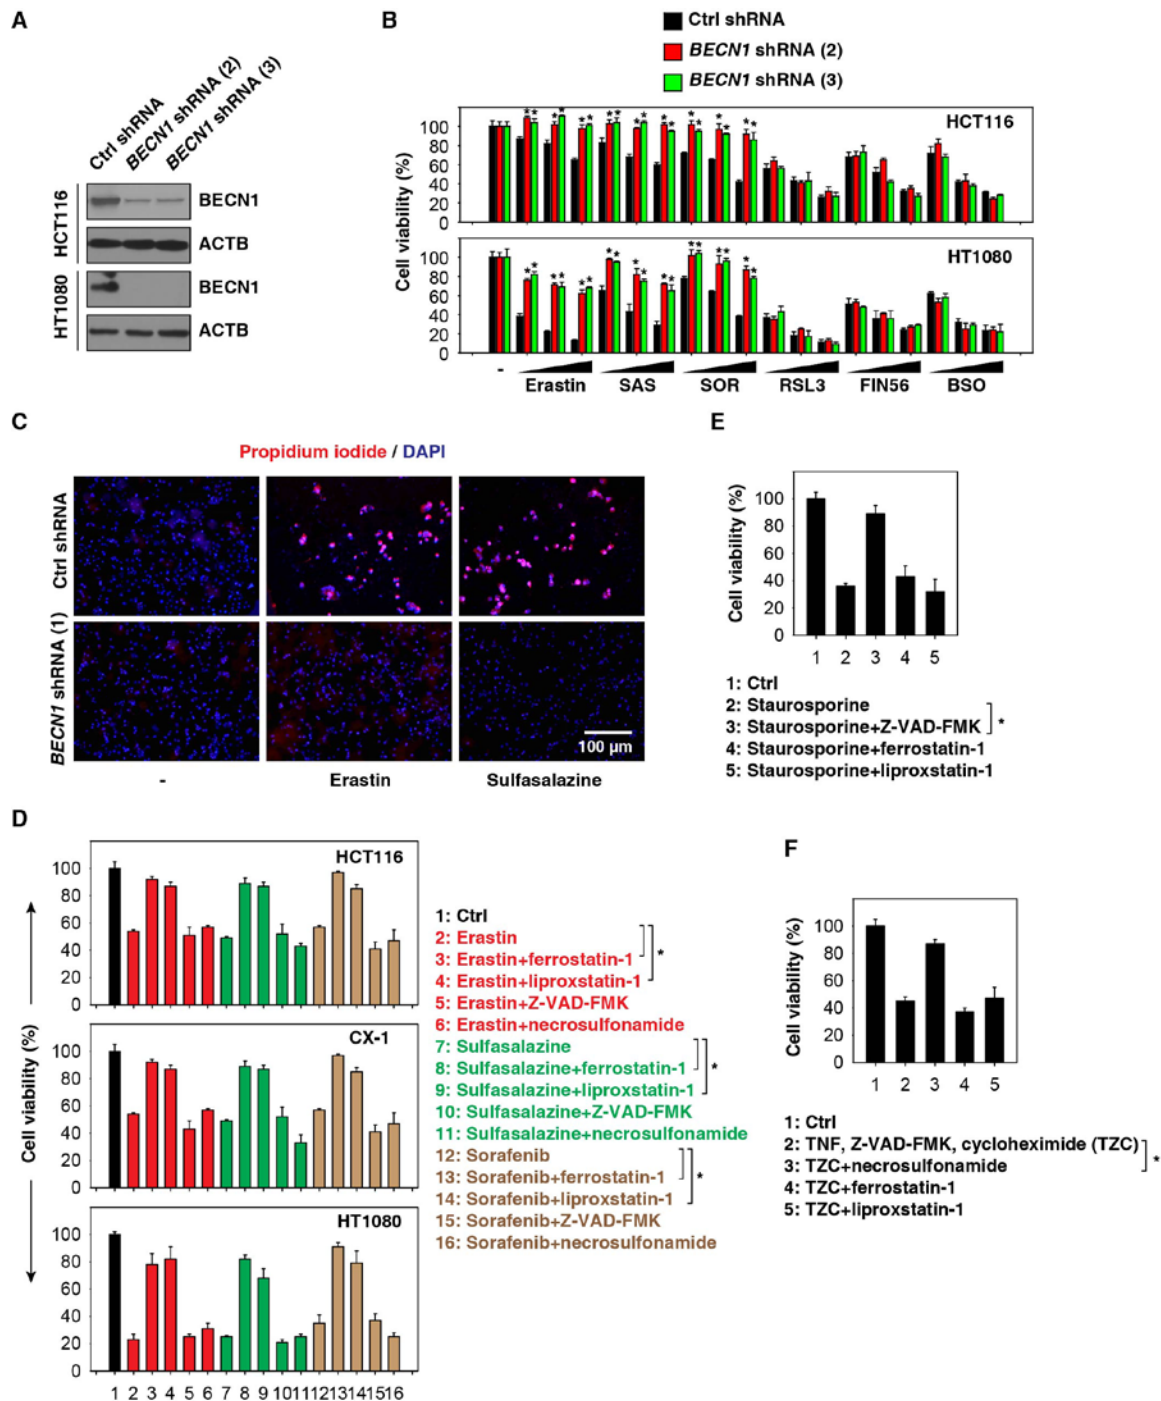

**Figure S2. BECN1 is required for system  $X_c^-$  inhibitor-induced ferroptosis, Related to Figure 1.** (A) Western blot analysis of BECN1 expression in BECN1-knockdown cells. (B) Knockdown of BECN1 inhibited erastin (20  $\mu$ M)-, sulfasalazine (SAS, 1 mM)-, and sorafenib (SOR, 10  $\mu$ M)-induced cell death, but not RSL3 (1  $\mu$ M)-, FIN56 (5  $\mu$ M)- and buthionine sulfoximine (BSO, 100  $\mu$ M)-induced cell death at 24, 48, and 72 h (n=3, \*,

$P < 0.05$  versus control group,  $t$  test). **(C)** Analysis of cell death by propidium iodide staining (red) in indicated HT1080 cells with or without erastin (5  $\mu$ M) and sulfasalazine (1 mM) for 24 hours. **(C)** The indicated BECN1-overexpressing cells were treated with erastin (20  $\mu$ M for HCT116 and CX-1 cells; 5  $\mu$ M for HT1080 cells) in the absence or presence of Z-VAD-FMK (20  $\mu$ M), ferrostatin-1 (500 nM), liproxstatin-1 (200 nM), and necrosulfonamide (1  $\mu$ M) for 24 h. Cell viability was assayed ( $n=3$ ,  $*p < 0.05$ ,  $t$ -test). **(D)** HCT116 cells were treated with staurosporine (1  $\mu$ M) in the absence or presence of Z-VAD-FMK (20  $\mu$ M), ferrostatin-1 (500 nM), and liproxstatin-1 for 24 h. Cell viability was assayed ( $n=3$ ,  $*p < 0.05$ ,  $t$ -test). **(E)** HCT116 cells were treated with TZC (TNF [50 nM], Z-VAD-FMK [20  $\mu$ M], cycloheximide [10  $\mu$ g/ml]) in the absence or presence of necrosulfonamide (1  $\mu$ M), ferrostatin-1 (500 nM), and liproxstatin-1 for 24 h. Cell viability was assayed ( $n=3$ ,  $*p < 0.05$ ,  $t$ -test).

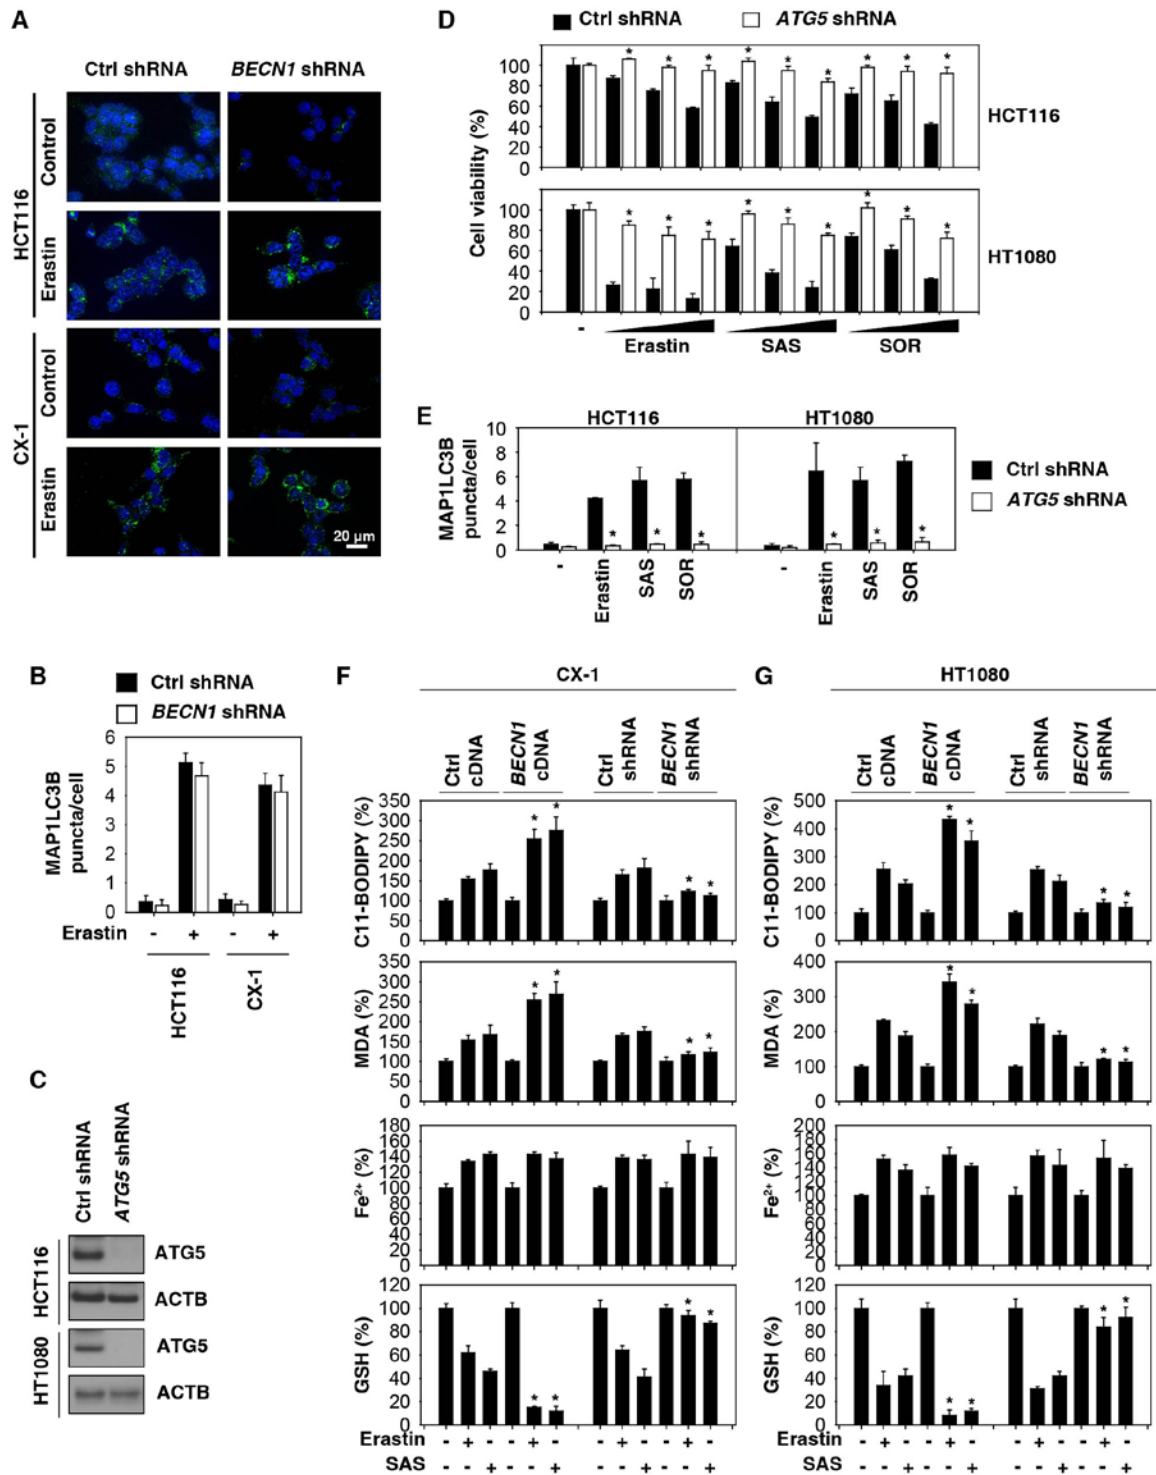

**Figure S3. Effects of BECN1 and ATG5 on ferroptosis and autophagy, Related to Figure 2.** (A) Representative images (green, MAP1LC3B; blue, nucleus) of erastin (20

$\mu\text{M}$ , 6 h)-induced MAP1LC3B puncta formation in HCT116 and CX-1 cells by image analysis. **(B)** Quantitative analysis of MAP1LC3B puncta per cell in panel A. Images were acquired digitally from a randomly selected pool of 10 fields under each condition. **(C)** Western blot analysis of ATG5 expression in ATG5-knockdown cells. **(D)** Knockdown of ATG5 inhibited erastin (20  $\mu\text{M}$  for HCT116 cells; 5  $\mu\text{M}$  for HT1080 cells)-, sulfasalazine (SAS, 1 mM)-, and sorafenib (SOR, 10  $\mu\text{M}$ )-induced cell death at 24, 48, and 72 h ( $n=3$ , \*,  $P<0.05$  versus control shRNA group,  $t$  test). **(E)** Knockdown of ATG5 inhibited erastin (20  $\mu\text{M}$  for HCT116 cells; 5  $\mu\text{M}$  for HT1080 cells)-, sulfasalazine (1 mM)-, and sorafenib (10  $\mu\text{M}$ )-induced MAP1LC3B puncta formation (\*,  $P<0.05$  versus control shRNA group,  $t$  test). **(F)** The indicated CX-1 cells were treated with erastin (20  $\mu\text{M}$ ) or sulfasalazine (SAS, 1 mM) for 24 h. The relative levels of C11-BODIPY, MDA,  $\text{Fe}^{2+}$ , and GSH were assayed ( $n=3$ , \*,  $P<0.05$  versus control group,  $t$  test). **(G)** The indicated HT1080 cells were treated with erastin (5  $\mu\text{M}$ ) or sulfasalazine (1 mM) for 24 h. The relative levels of C11-BODIPY, MDA,  $\text{Fe}^{2+}$ , and GSH were assayed ( $n=3$ , \*,  $P<0.05$  versus control group,  $t$  test).

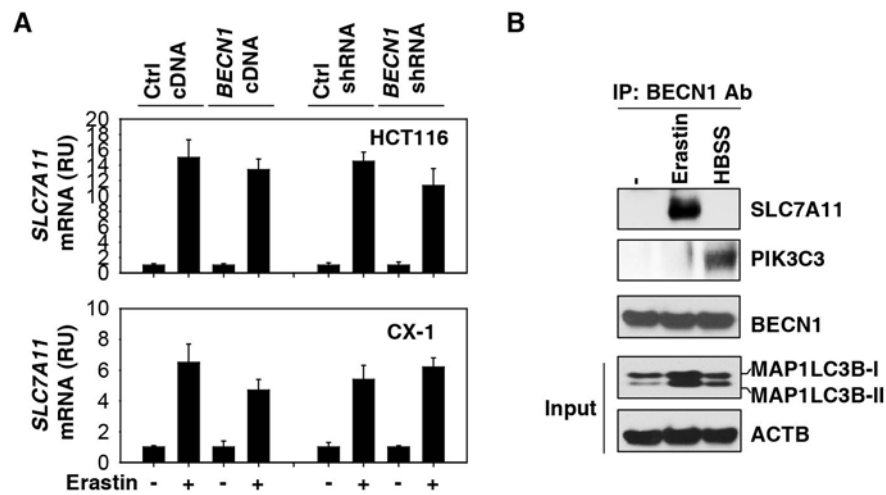

**Figure S4. BECN1 protein complex in ferroptosis and autophagy, Related to Figure 3.** (A) The indicated HCT116 and CX-1 cells were treated with erastin (20  $\mu$ M) for 24 h. The relative mRNA levels of *SLC7A11* were assayed (n=3). RU, relative units. (B) IP analysis of BECN1-SLC7A11 and BECN1-PIK3C3 formation in HCT116 cells following erastin (20  $\mu$ M, 24 h) or HBSS (6 h) treatment.

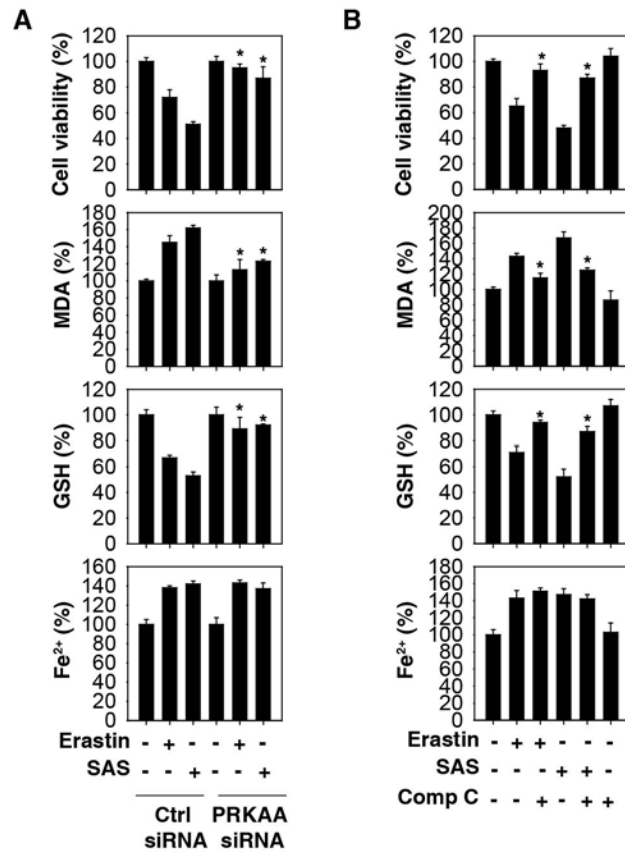

**Figure S5. AMPK is required for System X<sub>c</sub><sup>-</sup> inhibitor-induced ferroptosis, Related to Figure 5.** (A) Analysis of the levels of cell viability, MDA, GSH, and Fe<sup>2+</sup> in the indicated CX-1 cells following erastin (20  $\mu$ M) or sulfasalazine (SAS, 1 mM) treatment for 24 h (n=3, \*,  $P<0.05$  versus control group,  $t$  test). (B) Analysis of the levels of cell viability, MDA, GSH, and Fe<sup>2+</sup> in CX-1 cells following erastin (20  $\mu$ M) or sulfasalazine (1 mM) treatment with or without compound C (Comp C, 1  $\mu$ M) for 24 h (n=3, \*,  $P<0.05$  versus erastin or SAS group,  $t$  test).

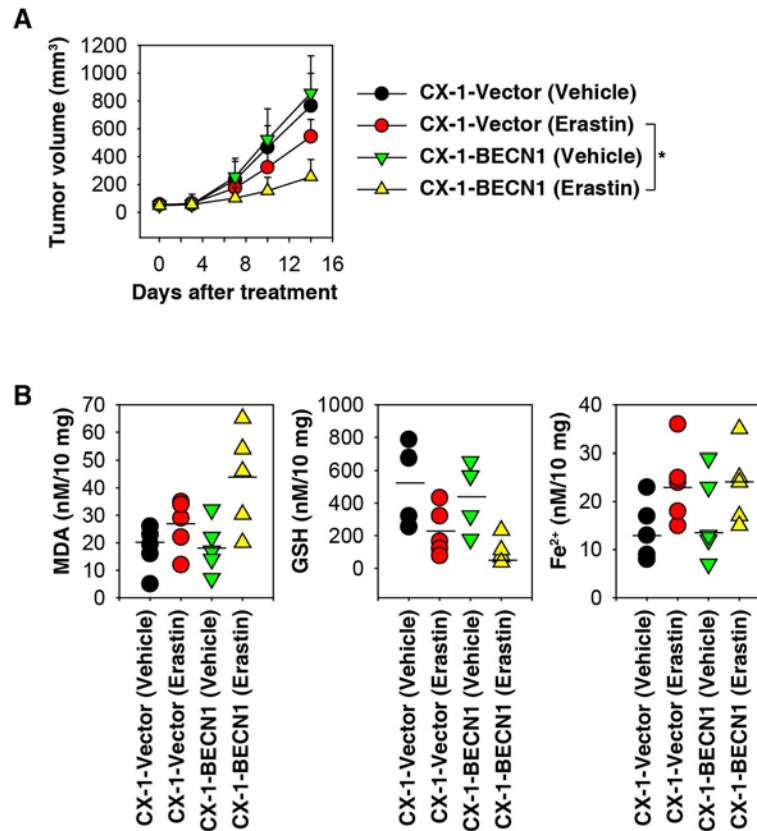

**Figure S6. BECN1 contributes to the anticancer activity of erastin *in vivo*, Related to Figure 6.** (A) Athymic nude mice were injected subcutaneously with the indicated CX-1 cells and treated with erastin (40 mg/kg/intraperitoneal injection, once every day) at day 7 for two weeks. Tumor volume was calculated weekly (n=5 mice/group, \* p < 0.05, ANOVA LSD test). (B) In parallel, MDA, GSH, and Fe<sup>2+</sup> levels in the isolated tumors at day 14 after treatment were assayed (n=5 mice/group).

| REAGENT or RESOURCE                                                                                                              | SOURCE        | IDENTIFIER |
|----------------------------------------------------------------------------------------------------------------------------------|---------------|------------|
| Human SLC7A11 Q-PCR primers:<br>5'-TCCTGCTTTGGCTCCATGAACG-3' and 5'-<br>AGAGGAGTGTGCTTGCGGACAT-3'                                | Sigma-Aldrich | This paper |
| Human RNA18S Q-PCR primers:<br>5'-CTACCACATCCAAGGAAGCA-3' and<br>5'-TTTTTCGTCACCTCCCCG-3'                                        | Sigma-Aldrich | This paper |
| Human FTH1 Q-PCR primers: 5'-<br>TGAAGCTGCAGAACCAACGAGG-3' and 5'-<br>GCACACTCCATTGCATTCAGCC-3'                                  | Sigma-Aldrich | This paper |
| Human FTL Q-PCR primers:<br>5'-TACGAGCGTCTCCTGAAGATGC-3' and 5'-<br>GGTTCAGCTTTTTCTCCAGGGC-3'                                    | Sigma-Aldrich | This paper |
| Human TFRC Q-PCR primers: 5'-<br>ATCGGTTGGTGCCACTGAATGG-3' and 5'-<br>ACAACAGTGGGCTGGCAGAAAC-3'                                  | Sigma-Aldrich | This paper |
| Human SLC11A2 Q-PCR primers: 5'-<br>AGCTCCACCATGACAGGAACCT-3' and 5'-<br>TGGCAATAGAGCGAGTCAGAACC-3'                              | Sigma-Aldrich | This paper |
| Human SLC40A1 Q-PCR primers: 5'-<br>GAGACAAGTCCTGAATCTGTGCC-3' and 5'-<br>TTCTTGCAGCAACTGTGTCACAG-3'                             | Sigma-Aldrich | This paper |
| pcDNA4-Becn1 S15A mutant primers:<br><br>S15A-F,<br>GCACCATGCAGGTGGCCTTCGTGTGCCAGC;<br>S15A-R,<br>GCTGGCACACGAAGGCCACCTGCATGGTGC | Sigma-Aldrich | This paper |



|                                                                                                                                                                                                                                                                                                                                 |               |            |
|---------------------------------------------------------------------------------------------------------------------------------------------------------------------------------------------------------------------------------------------------------------------------------------------------------------------------------|---------------|------------|
| <p>pcDNA4-Becn1 S113A mutant primers:</p> <p>113Aa- reverse,<br/>CATGGAGAACCTCAGCCAGACAGATGTGGA<br/>TC;</p> <p>129Aa- forward,<br/>GATCCACATCTGTCTGGCTGAGGTTCTCCAT<br/>G;</p> <p>1Aa-forward (BamH1),<br/>AGCTCGGATCCATGGAAGGGTCTAAGACGT<br/>CC;</p> <p>450Aa-reverse (Not 1)<br/>GTAGTCGCGGCCGCTTTGTTATAAAATTGTG<br/>AGGAC</p> | Sigma-Aldrich | This paper |
|---------------------------------------------------------------------------------------------------------------------------------------------------------------------------------------------------------------------------------------------------------------------------------------------------------------------------------|---------------|------------|

**Table S1. Primers used for mutant and qPCR, related to STAR Methods**
